# Supplementary material for: Efficiency and stability enhancement of perovskite solar cells using reduced graphene oxide derived from earth-abundant natural graphite
Source: Royal Society of Chemistry journal article supplement (doi:10.1039/d0ra01423k), 2020-01-01
Supplement: d0ra01423k1.pdf [file d0ra01423k1.pdf]

## Supporting Information for

### Efficiency and stability enhancement of perovskite solar cells using reduced graphene oxide derived from earth-abundant natural graphite

Selengesuren Suragtkhuu,<sup>a</sup> Odonchimeg Tserendavag,<sup>a</sup> Ulziibayar Vandandoo,<sup>b</sup> Abdulaziz S. R. Bati,<sup>c</sup> Munkhjargal Bat-Erdene,<sup>c</sup> Joseph G. Shapter,<sup>c,\*</sup> Munkhbayar Batmunkh,<sup>c,d\*</sup> and Sarangerel Davaasambuu,<sup>a\*</sup>

<sup>a</sup> Department of Chemistry, School of Arts and Sciences, National University of Mongolia, Ulaanbaatar 14200, Mongolia. E-mail: [sarangerel@num.edu.mn](mailto:sarangerel@num.edu.mn)

<sup>b</sup> School of Applied Sciences, Mongolian University of Science and Technology, Ulaanbaatar 14191; and Institute of Mathematics and Digital Technology, Mongolian Academy of Sciences, Ulaanbaatar, Mongolia.

<sup>c</sup> Australian Institute for Bioengineering and Nanotechnology, The University of Queensland, St Lucia, Brisbane, Queensland, 4072 Australia. E-mail: [j.shapter@uq.edu.au](mailto:j.shapter@uq.edu.au); E-mail: [m.batmunkh@uq.edu.au](mailto:m.batmunkh@uq.edu.au)

<sup>d</sup> Centre for Clean Environment and Energy, Griffith University, Gold Coast, Queensland 4222, Australia.

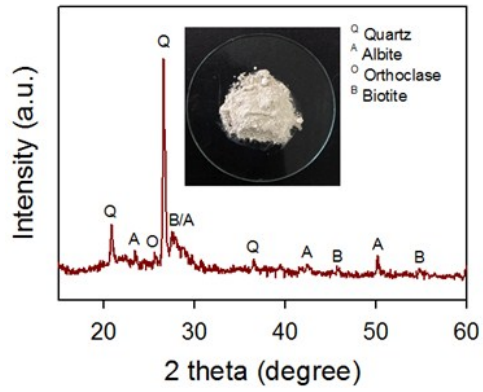

**Fig. S1** XRD pattern of white residue obtained after chemical oxidation of raw (graphite) sample. Inset shows the digital photograph of the white powder used for the XRD.

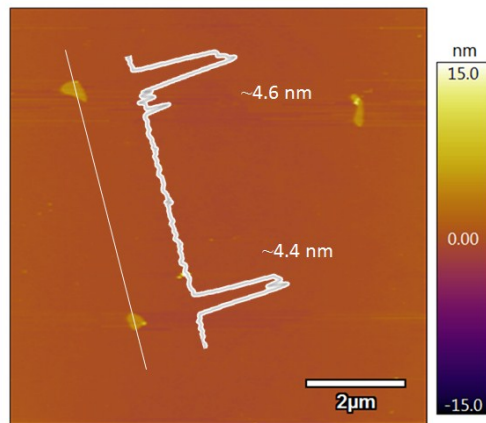

**Fig. S2** AFM image of GO prepared from raw (graphite) sample.

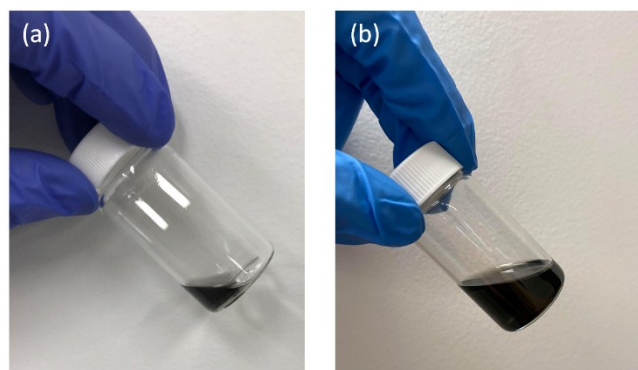

**Fig. S3** Dispersion of the rGO in (a) dimethylformamide (DMF) solvent and (b) chlorobenzene (CBZ) solvent.

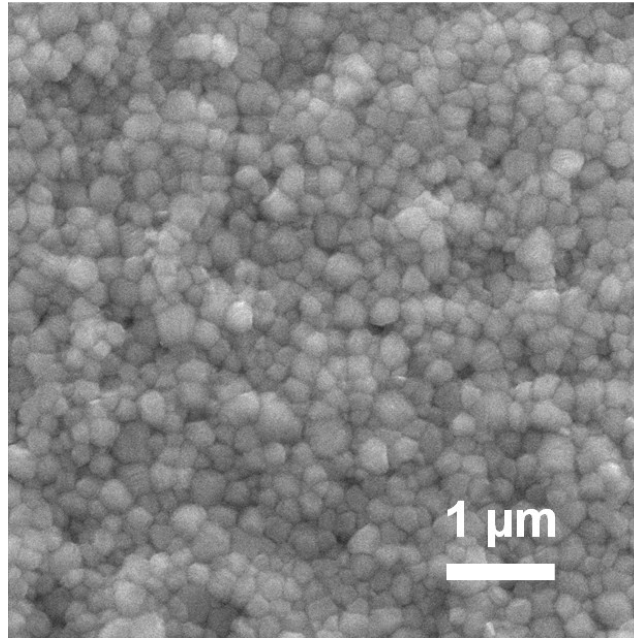

**Fig. S4** SEM image of perovskite film.

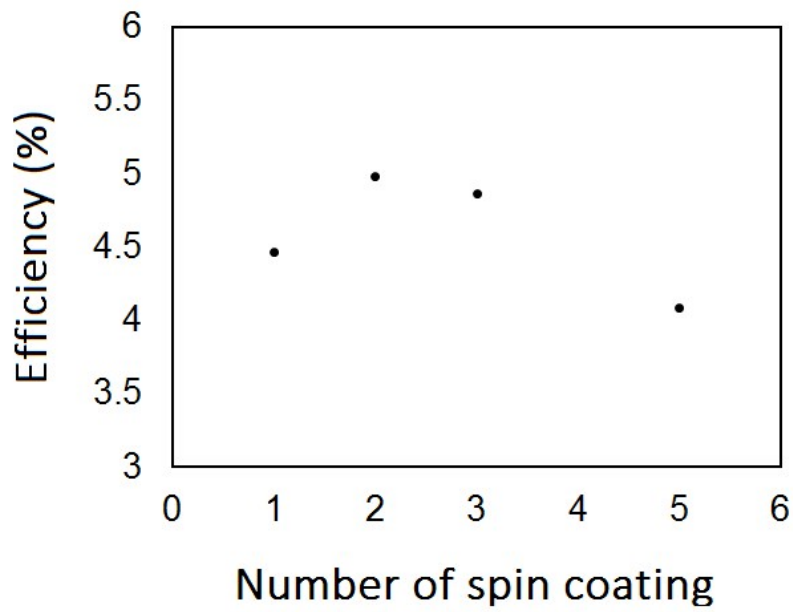

**Fig. S5** Efficiencies of rGO HTM based PSCs. The devices were fabricated by spin coating rGO solutions on perovskite layer.

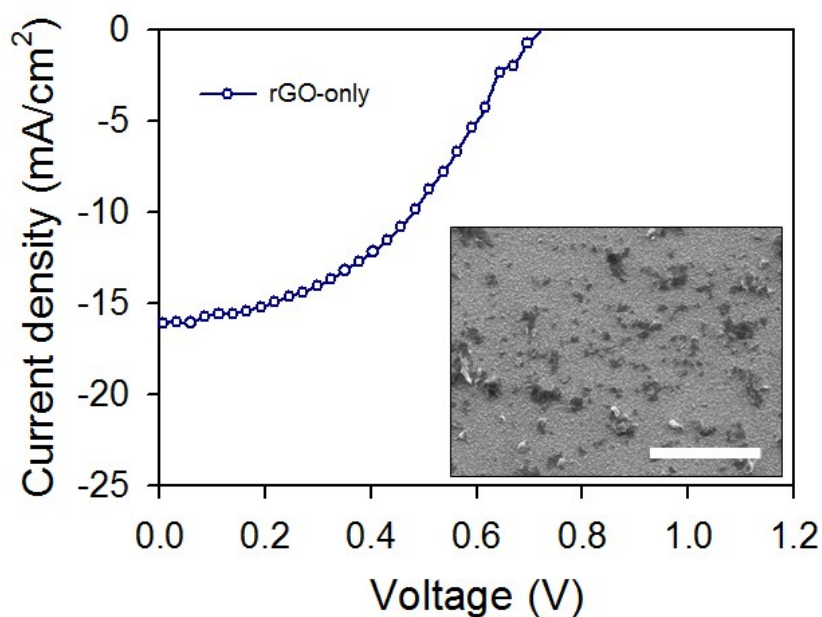

**Fig. S6** J–V curve of the PSC fabricated with rGO-only HTM. Inset shows the SEM image of the rGO coated perovskite film, revealing a partial coverage of rGO using spin coating. The rGO was spin coated on the perovskite at 4000 rpm for 20 s using 1 mg mL<sup>-1</sup> rGO dispersion in chlorobenzene. Scale bar: 50 μm.

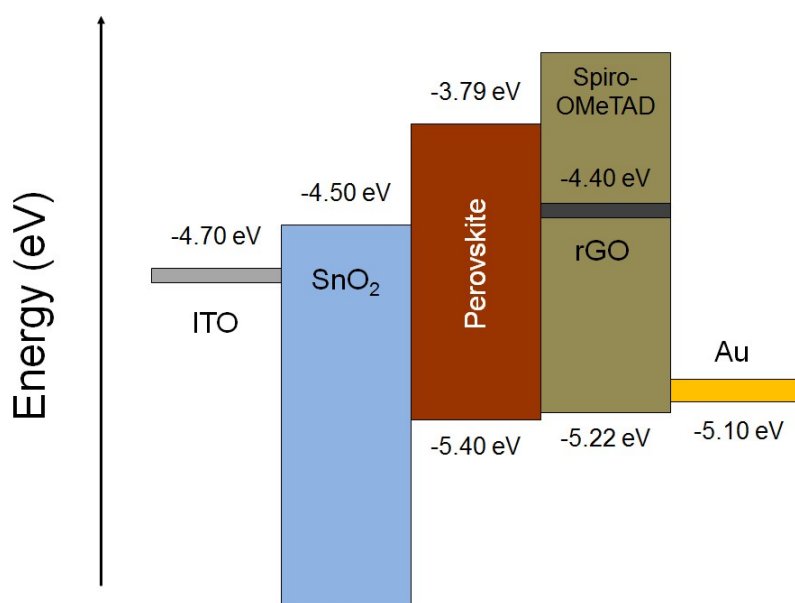

**Fig. S7** Energy level diagram of PSC fabricated with rGO+Spiro-MeTAD.

**Table S1.** PV parameters of fresh and 500 h aged PSCs fabricated rGO-only, Spiro-OMeTAD and rGO+Spiro-OMeTAD as the HTM (data extracted from Fig. 5).

| <b>Device</b>    |       | <b>J<sub>sc</sub> (mA cm<sup>-2</sup>)</b> | <b>V<sub>oc</sub> (V)</b> | <b>FF</b> | <b>PCE (%)</b> |
|------------------|-------|--------------------------------------------|---------------------------|-----------|----------------|
| rGO-only         | Fresh | 16.20                                      | 0.72                      | 0.43      | 4.98           |
|                  | 500 h | 5.06                                       | 0.27                      | 0.30      | 0.41           |
| Spiro-OMeTAD     | Fresh | 22.56                                      | 1.10                      | 0.70      | 17.26          |
|                  | 500 h | 21.84                                      | 1.00                      | 0.43      | 9.31           |
| rGO+Spiro-OMeTAD | Fresh | 23.05                                      | 1.11                      | 0.71      | 18.13          |
|                  | 500 h | 21.61                                      | 1.06                      | 0.60      | 13.68          |
